# Supplementary material for: Genome-wide characterization and expression profiling of NAC transcription factor genes under abiotic stresses in radish (Raphanus sativus L.)
Source: PeerJ. 2017 Dec 15;5:e4172. doi: 10.7717/peerj.4172 (PMC5733918; doi:10.7717/peerj.4172)
Supplement: Table S3 — Clustering of groups A and B based on the similarity in NAC domain structures, group A contain nine subgroups (A1–A9) mostly related to eudicot while group B is composed of ten subgroups (B1–B10) mostly related to monocot. [file peerj-05-4172-s007.xlsx]

## Sheet: Sheet1
Table S3. Detailed information of the Phylogenetic tree among the NAC TFs of radish, Arabidopsis, and rice.
(A1)	(A2)	(B1)	(A3)	(B2)	(A4)	(A5)	(A6)	(A7)	(B3)	(B4)	(A8)	(B5)	(A9)	(B6)	(B7)	(B8)	(B9)	(A10)
AT1G32770.1	AT1G12260.1	AT1G56010.2	AT1G76420. 1	AT3G04060.1	AT3G10480.1	AT1G32870.1	AT1G33060.1	AT1G32510.1	AT3G44350.1	AT2G02450.1	AT1G26870.1	AT1G52880.1	AT1G01720.1	AT2G33480.1	AT5G04400.1	AT1G25580.1	AT1G03490.1	AT1G01010.1
AT1G33280.1	AT1G62700.1	AT3G12977.1	AT2G24430. 1	AT3G29035.1	AT3G10480.2	AT1G32870.2	AT1G33060.2	AT1G54330.1	AT3G44350.2	AT2G02450.2	AT2G43000.1	AT1G61110.1	AT1G52890.1	AT2G33480.2	OsIBCD001529	AT1G28470.1	AT1G60280. 1	AT1G02220.1
AT1G79580.1	AT1G71930.1	AT4G28530.1	AT2G24430. 2	AT5G07680.1	AT3G10490.1	AT1G34180.1	AT2G27300.1	AT1G65910.1	OsIBCD003962	AT2G17040.1	AT3G12910.1	AT1G69490.1	AT1G77450.1	AT5G13180.1	OsIBCD005178	AT3G01600.1	AT1G60350. 1	AT1G02230.1
AT1G79580.2	AT2G18060.1	AT4G28530.2	AT3G15170. 1	AT5G07680.2	AT3G10490.2	AT1G34190.1	AT3G44290.1	AT3G03200.1	OsIBCD018173	OsIBCD004117	AT5G39820.1	AT3G04070.1	AT3G15500.1	AT5G14000.1	OsIBCD010984	AT4G28500.1	AT1G64100.2	AT1G02250.1
AT1G79580.3	AT4G36160.1	OsIBCD004924	AT3G18400. 1	AT5G18270.1	AT3G10500.1	OsIBCD028981	AT3G49530.1	AT3G17730.1	OsIBCD030168	OsIBCD004118	OsIBCD007957	AT3G04070.2	AT4G27410.2	AT5G41090.1	OsIBCD018605	AT4G29230.1	AT3G56560. 1	AT3G04420.1
AT2G46770.1	AT5G62380.1	OsIBCD008351	AT5G53950. 1	AT5G18270.2	AT5G04410.1	RsNAC124	AT4G35580.1	AT4G17980.1	OsIBCD031877	OsIBCD008756	OsIBCD012131	AT3G15510.1	AT4G27410.3	AT5G64530.1	OsIBCD026060	AT5G14490.1	OsIBCD003666	AT3G04420.2
AT3G61910.1	AT5G66300.1	OsIBCD008597	OsIBCD01123 6	AT5G39610.1	AT5G09330.1	RsNAC126	AT4G35580.2	AT5G17260.1	OsIBCD046448	OsIBCD018033	OsIBCD022299	OsIBCD000030	AT5G08790.1	OsIBCD004350	OsIBCD030467	AT5G56620.1	OsIBCD012380	AT3G04430.1
AT4G10350.1	OsIBCD008713	OsIBCD015608	OsIBCD020488	AT5G61430.1	AT5G09330.2	RsNAC146	AT5G22290.1	AT5G46590.1	RsNAC010	OsIBCD024805	OsIBCD026632	OsIBCD000032	AT5G63790.1	OsIBCD006845	OsIBCD030469	OsIBCD000598	OsIBCD012383	AT3G55210.1
OsIBCD019289	OsIBCD024736	OsIBCD015620	OsIBCD027054	OsIBCD000036	AT5G09330.3	RsNAC157	AT5G24590.2	OsIBCD008663	RsNAC067	OsIBCD042508	OsIBCD026634	OsIBCD005519	OsIBCD003695	OsIBCD014406	OsIBCD030500	OsIBCD002868	OsIBCD012497	AT3G56530.1
OsIBCD020942	OsIBCD031299	OsIBCD021770	OsIBCD028998	OsIBCD001882	AT5G64060.1	RsNAC158	OsIBCD001057	OsIBCD029336	RsNAC073	RsNAC016	OsIBCD035746	OsIBCD018014	OsIBCD004091	OsIBCD027223	OsIBCD030502	OsIBCD007065	OsIBCD012566	AT4G01520.1
OsIBCD024819	OsIBCD040616	OsIBCD025304	RsNAC022	OsIBCD006984	OsIBCD016121	RsNAC167	OsIBCD019108	OsIBCD029337	RsNAC123	RsNAC075	RsNAC017	OsIBCD023921	OsIBCD012399	OsIBCD029076	OsIBCD030555	OsIBCD009308	OsIBCD024739	AT4G01540.1
OsIBCD032154	RsNAC020	OsIBCD030962	RsNAC031	OsIBCD010002	OsIBCD018079		OsIBCD025045	OsIBCD031530		RsNAC084	RsNAC038	OsIBCD024628	OsIBCD018051	OsIBCD032944	OsIBCD030560	OsIBCD014700	OsIBCD02481 7	AT4G01540.2
RsNAC004	RsNAC029	OsIBCD035628	RsNAC049	OsIBCD014570	OsIBCD027428		RsNAC023	RsNAC005		RsNAC097	RsNAC070	OsIBCD031710	OsIBCD032047	OsIBCD032945	OsIBCD030563	OsIBCD016723	OsIBCD027947	AT4G01550.1
RsNAC025	RsNAC035	OsIBCD035631	RsNAC053	OsIBCD024634	RsNAC014		RsNAC034	RsNAC013		RsNAC137	RsNAC089	OsIBCD033913	OsIBCD032056	OsIBCD032946	OsIBCD039125	OsIBCD018881	OsIBCD030249	AT5G39690.1
RsNAC056	RsNAC050	RsNAC001	RsNAC054	OsIBCD026613	RsNAC018		RsNAC040	RsNAC036			RsNAC098	OsIBCD033915	OsIBCD042781	OsIBCD032947	OsIBCD041047	OsIBCD020098	OsIBCD033988	OsIBCD029879
RsNAC064	RsNAC057	RsNAC037	RsNAC061	OsIBCD028529	RsNAC019		RsNAC052	RsNAC046			RsNAC109	RsNAC047	RsNAC003	OsIBCD032949	OsIBCD042717	OsIBCD021069	OsIBCD036707	OsIBCD034029
RsNAC065	RsNAC059	RsNAC110	RsNAC063	OsIBCD031711	RsNAC028		RsNAC058	RsNAC069			RsNAC114	RsNAC071	RsNAC027	OsIBCD034925	OsIBCD042720	RsNAC002	OsIBCD039564	RsNAC024
RsNAC118	RsNAC078	RsNAC130	RsNAC11 3	OsIBCD031714	RsNAC039		RsNAC060	RsNAC104			RsNAC127	RsNAC117	RsNAC048	RsNAC006	OsIBCD042723	RsNAC009	OsIBCD039588	RsNAC093
RsNAC119	RsNAC096		RsNAC11 5	OsIBCD033916	RsNAC041		RsNAC068	RsNAC112			RsNAC135	RsNAC120	RsNAC062	RsNAC007	OsIBCD042806	RsNAC015	OsIBCD046490	RsNAC094
RsNAC138	RsNAC099		RsNAC151	RsNAC026	RsNAC042		RsNAC074	RsNAC129			RsNAC171	RsNAC128	RsNAC077	RsNAC008	OsIBCD042856	RsNAC033	OsIBCD04661 9	RsNAC100
RsNAC154	RsNAC105		RsNAC162	RsNAC072	RsNAC043		RsNAC111	RsNAC149				RsNAC134	RsNAC088	RsNAC021	OsIBCD042968	RsNAC044	OsIBCD046632	RsNAC101
	RsNAC152		RsNAC165	RsNAC079	RsNAC076		RsNAC122	RsNAC169				RsNAC139	RsNAC092	RsNAC030	OsIBCD042969	RsNAC090	OsIBCD046634	RsNAC102
	RsNAC153			RsNAC086	RsNAC080			RsNAC170				RsNAC160	RsNAC107	RsNAC032	OsIBCD043787	RsNAC131	RsNAC012	RsNAC116
	RsNAC159			RsNAC087	RsNAC082							RsNAC172	RsNAC108	RsNAC055	RsNAC085		RsNAC011	RsNAC121
				RsNAC095	RsNAC091								RsNAC133	RsNAC066			RsNAC045	RsNAC142
				RsNAC103									RsNAC140	RsNAC081			RsNAC051	RsNAC143
				RsNAC106									RsNAC168	RsNAC083			RsNAC125	RsNAC144
				RsNAC163										RsNAC155			RsNAC132	RsNAC145
				RsNAC166													RsNAC136	RsNAC148
																	RsNAC141	RsNAC156
																	RsNAC147
																	RsNAC150
																	RsNAC161
																	RsNAC164
